# Supplementary material for: Low-Cytotoxic Synthetic Bromorutaecarpine Exhibits Anti-Inflammation and Activation of Transient Receptor Potential Vanilloid Type 1 Activities
Source: Hindawi journal article supplement (doi:10.1155/2013/795095), 2013-01-01
Supplement: f1 [file 795095.f1.pdf]

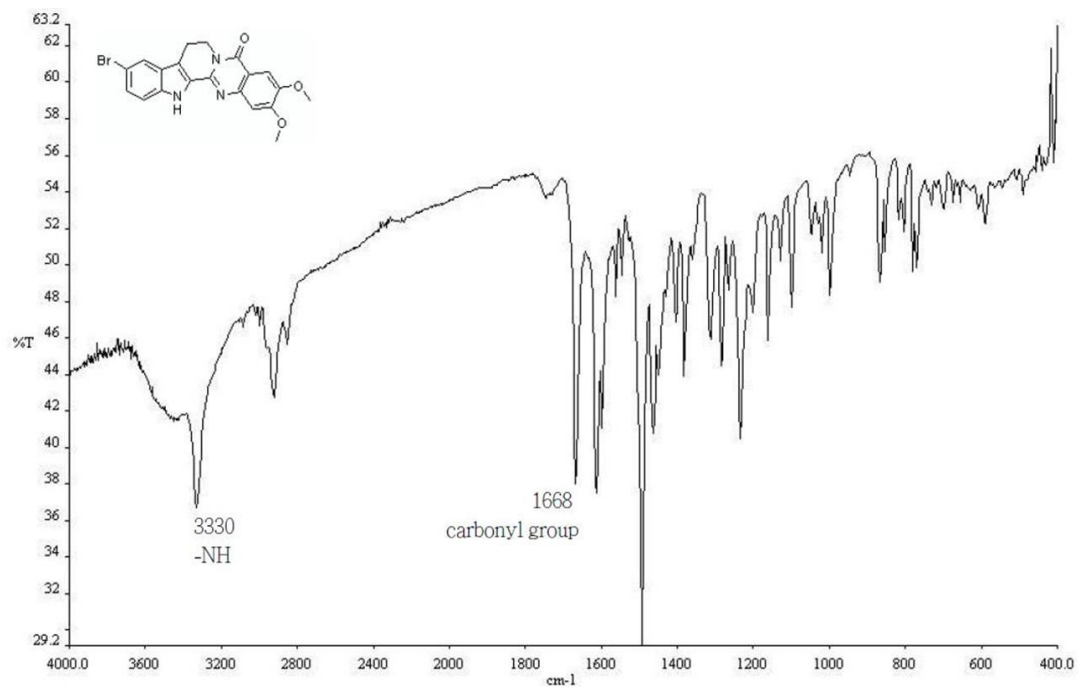

Supplementary Fig. S1: FT-IR (KBr, cm<sup>-1</sup>) spectrum of Br-RUT

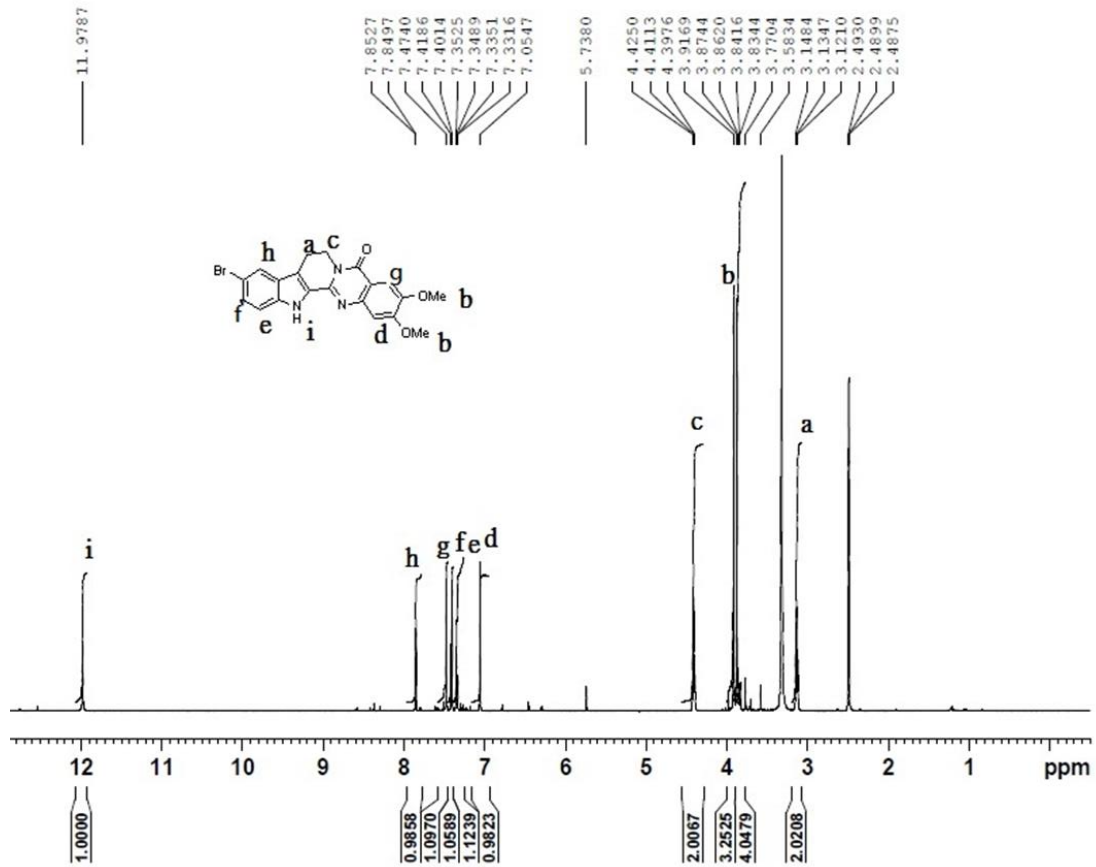

Supplementary Fig. S2: <sup>1</sup>H NMR spectrum of Br-RUT

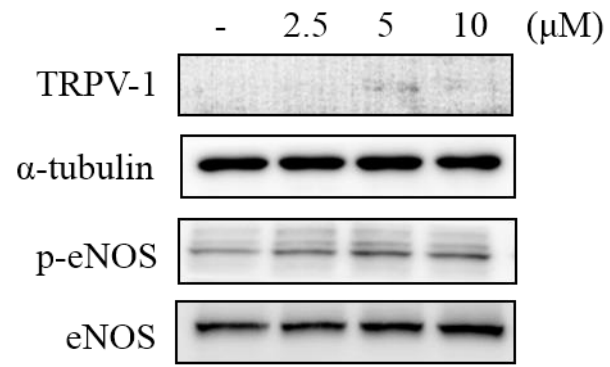

Supplementary Fig. S3: Effects of Br-RUT on TRPV-1 expression and eNOS phosphorylation in human coronary artery endothelial cells (HCAECs)
